# Supplementary material for: A heterostructural MoS 2 QDs@UiO-66 nanocomposite for the highly efficient photocatalytic degradation of methylene blue under visible light and simulated sunlight
Source: Royal Society of Chemistry journal article supplement (doi:10.1039/d3ra06299f), 2023-01-01
Supplement: d3ra06299f1.pdf [file d3ra06299f1.pdf]

Figure S1 shows that the MB-adsorption capacity of UiO-66@MoS<sub>2</sub>QDs enhanced with an extended initial concentration of MB until it reached the maximum adsorption capacity. The adsorbed amount of MB was found to be 46.5 mg/g using the following equation  $q_e \text{ (mg/g)} = (C_i - C_f)(V/m)$ . Where,  $C_i$  and  $C_f$  (ppm) are the initial and final MB-concentration;  $V$  is the volume of MB solution (L), and  $w$  is the UiO-66@MoS<sub>2</sub>QDs (g) mass.

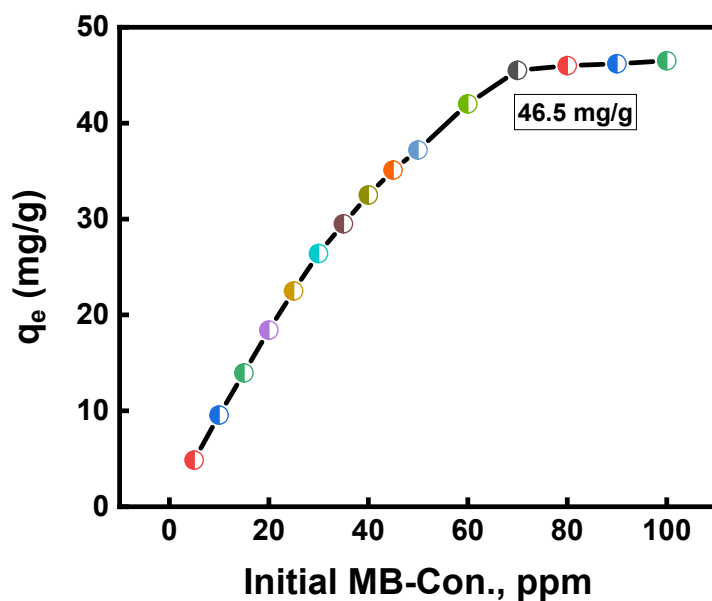

Figure S1. Impact of the MB concentration on the MB-adsorption capacity  $q_e$ , mg/g.
